# Supplementary material for: Primary Care Practice Telehealth Use and Low-Value Care Services
Source: PubMed Central journal article supplement (PMC11544489; doi:10.1001/jamanetworkopen.2024.45436), 2024-11-07
Supplement: jamanetwopen-e2445436-s001.pdf [file jamanetwopen-e2445436-s001.pdf]

## Supplemental Online Content

Liu T, Zhu Z, Thompson MP, et al. Primary care practice telehealth use and low-value care services. *JAMA Netw Open*. 2024;7(11):e2445436. doi:10.1001/jamanetworkopen.2024.45436

**eTable 1.** Detail on Telehealth Services

**eTable 2.** Detail on Low-Value Care Measures

**eFigure.** Parallel Trends Assessment for Low-Value Care Services During Preintervention Period

**eTable 3.** Multivariable Regression Results of Association Between Telehealth Use Tertile and Office-Based and Mixed-Modality Low-Value Services

**eTable 4.** Multivariable Regression Results of Association Between Telehealth Use Tertile and Laboratory-Based Low-Value Services

**eTable 5.** Multivariable Regression Results of Association Between Telehealth Use Tertile and Imaging-Based Low-Value Services

**eReferences.**

This supplemental material has been provided by the authors to give readers additional information about their work.

**eTable 1. Detail on Telehealth Services**

| Type of telehealth                          | Healthcare Common Procedure Coding System (HCPCS) codes                                                                                                                                                                                                                                                                                                                                                                                                                                                                                                                                                                                                                                                                                                                                                                                                                                                                                                                                                                                                                                                                                                                                                                                                                                                                                                                                                                                                                                                                                                                                                                                                                                                                                                                                                                                                                                                                                                                                                                                                                           |
|---------------------------------------------|-----------------------------------------------------------------------------------------------------------------------------------------------------------------------------------------------------------------------------------------------------------------------------------------------------------------------------------------------------------------------------------------------------------------------------------------------------------------------------------------------------------------------------------------------------------------------------------------------------------------------------------------------------------------------------------------------------------------------------------------------------------------------------------------------------------------------------------------------------------------------------------------------------------------------------------------------------------------------------------------------------------------------------------------------------------------------------------------------------------------------------------------------------------------------------------------------------------------------------------------------------------------------------------------------------------------------------------------------------------------------------------------------------------------------------------------------------------------------------------------------------------------------------------------------------------------------------------------------------------------------------------------------------------------------------------------------------------------------------------------------------------------------------------------------------------------------------------------------------------------------------------------------------------------------------------------------------------------------------------------------------------------------------------------------------------------------------------|
| Modifier                                    | Modifier: G0, GQ, GT, FR, FQ, 93, 95                                                                                                                                                                                                                                                                                                                                                                                                                                                                                                                                                                                                                                                                                                                                                                                                                                                                                                                                                                                                                                                                                                                                                                                                                                                                                                                                                                                                                                                                                                                                                                                                                                                                                                                                                                                                                                                                                                                                                                                                                                              |
| Codes/Place of Service (POS)                | Place of service: 02, 10                                                                                                                                                                                                                                                                                                                                                                                                                                                                                                                                                                                                                                                                                                                                                                                                                                                                                                                                                                                                                                                                                                                                                                                                                                                                                                                                                                                                                                                                                                                                                                                                                                                                                                                                                                                                                                                                                                                                                                                                                                                          |
| Video/Audio                                 | <p>In addition of having modifier/POS, we used the following HCPCS codes in CMS annual telehealth list<sup>1</sup>:</p> <p>0362T, 0373T, 77427, 90875, 90901, 90951, 90952, 90953, 90954, 90955, 90956, 90957, 90958, 90959, 90960, 90961, 90962, 90963, 90964, 90965, 90966, 90967, 90968, 90969, 90970, 92002, 92004, 92012, 92014, 92526, 92550, 92552, 92553, 92555, 92556, 92557, 92563, 92565, 92567, 92568, 92570, 92587, 92588, 92601, 92602, 92603, 92604, 92607, 92608, 92609, 92610, 92625, 92626, 92627, 93750, 93797, 93798, 94002, 94003, 94004, 94005, 94625, 94626, 94664, 95970, 95971, 95972, 95983, 95984, 96105, 96110, 96112, 96113, 96125, 96170, 96171, 97110, 97112, 97116, 97129, 97130, 97150, 97151, 97152, 97153, 97154, 97155, 97156, 97157, 97158, 97161, 97162, 97163, 97164, 97165, 97166, 97167, 97168, 97530, 97537, 97542, 97750, 97755, 97760, 97761, 97763, 98960, 98961, 98962, 99202, 99203, 99204, 99205, 99211, 99212, 99213, 99214, 99215, 99221, 99222, 99223, 99231, 99232, 99233, 99234, 99235, 99236, 99238, 99239, 99281, 99282, 99283, 99284, 99285, 99291, 99292, 99304, 99305, 99306, 99307, 99308, 99309, 99310, 99315, 99316, 99341, 99342, 99344, 99345, 99347, 99348, 99349, 99350, 99468, 99469, 99471, 99472, 99473, 99475, 99476, 99477, 99478, 99479, 99480, 99483, 99495, 99496, G0136, G0316, G0317, G0318, G0410, G0422, G0423, G0508, G0509, G3002, G3003, G9685, 0591T, 0592T, 0593T, 90785, 90791, 90792, 90832, 90833, 90834, 90836, 90837, 90838, 90839, 90840, 90845, 90846, 90847, 90853, 92507, 92508, 92521, 92522, 92523, 92524, 96116, 96121, 96127, 96130, 96131, 96132, 96133, 96136, 96137, 96138, 96139, 96156, 96158, 96159, 96160, 96161, 96164, 96165, 96167, 96168, 97535, 97802, 97803, 97804, 98966, 98967, 98968, 99406, 99407, 99441, 99442, 99443, 99497, 99498, G0108, G0109, G0270, G0296, G0396, G0397, G0406, G0407, G0408, G0420, G0421, G0425, G0426, G0427, G0438, G0439, G0442, G0443, G0444, G0445, G0446, G0447, G0459, G0506, G0513, G0514, G2086, G2087, G2088, G2211, G2212</p> |
| Audio Only                                  | <p>In addition of having modifier/POS, we used the following HCPCS codes in CMS annual telehealth list<sup>1</sup>:</p> <p>0591T, 0592T, 0593T, 90785, 90791, 90792, 90832, 90833, 90834, 90836, 90837, 90838, 90839, 90840, 90845, 90846, 90847, 90853, 92507, 92508, 92521, 92522, 92523, 92524, 96116, 96121, 96127, 96130, 96131, 96132, 96133, 96136, 96137, 96138, 96139, 96156, 96158, 96159, 96160, 96161, 96164, 96165, 96167, 96168, 97535, 97802, 97803, 97804, 98966, 98967, 98968, 99406, 99407, 99441, 99442, 99443, 99497, 99498, G0108, G0109, G0270, G0296, G0396, G0397, G0406, G0407, G0408, G0420, G0421, G0425, G0426, G0427, G0438, G0439, G0442, G0443, G0444, G0445, G0446, G0447, G0459, G0506, G0513, G0514, G2086, G2087, G2088, G2211, G2212</p>                                                                                                                                                                                                                                                                                                                                                                                                                                                                                                                                                                                                                                                                                                                                                                                                                                                                                                                                                                                                                                                                                                                                                                                                                                                                                                      |
| Phone                                       | 99441, 99442, 99443                                                                                                                                                                                                                                                                                                                                                                                                                                                                                                                                                                                                                                                                                                                                                                                                                                                                                                                                                                                                                                                                                                                                                                                                                                                                                                                                                                                                                                                                                                                                                                                                                                                                                                                                                                                                                                                                                                                                                                                                                                                               |
| Online digital E&M for established patients | 99421, 99422, 99423, G2061/98970, G2062/98971, G2063/98972                                                                                                                                                                                                                                                                                                                                                                                                                                                                                                                                                                                                                                                                                                                                                                                                                                                                                                                                                                                                                                                                                                                                                                                                                                                                                                                                                                                                                                                                                                                                                                                                                                                                                                                                                                                                                                                                                                                                                                                                                        |
| Remote physiologic monitoring               | 99453, 99454, 99457, 99458, 99091                                                                                                                                                                                                                                                                                                                                                                                                                                                                                                                                                                                                                                                                                                                                                                                                                                                                                                                                                                                                                                                                                                                                                                                                                                                                                                                                                                                                                                                                                                                                                                                                                                                                                                                                                                                                                                                                                                                                                                                                                                                 |
| Remote therapeutic monitoring               | 98975, 98976, 98977, 98980, 98981                                                                                                                                                                                                                                                                                                                                                                                                                                                                                                                                                                                                                                                                                                                                                                                                                                                                                                                                                                                                                                                                                                                                                                                                                                                                                                                                                                                                                                                                                                                                                                                                                                                                                                                                                                                                                                                                                                                                                                                                                                                 |
| Interprofessional internet consultation     | 99446, 99447, 99448, 99449, 99451, 99452                                                                                                                                                                                                                                                                                                                                                                                                                                                                                                                                                                                                                                                                                                                                                                                                                                                                                                                                                                                                                                                                                                                                                                                                                                                                                                                                                                                                                                                                                                                                                                                                                                                                                                                                                                                                                                                                                                                                                                                                                                          |
| Virtual check-ins                           | G2010/G2250, G2012/G2251, G2252                                                                                                                                                                                                                                                                                                                                                                                                                                                                                                                                                                                                                                                                                                                                                                                                                                                                                                                                                                                                                                                                                                                                                                                                                                                                                                                                                                                                                                                                                                                                                                                                                                                                                                                                                                                                                                                                                                                                                                                                                                                   |
| Safety-net providers                        | G0071, G2025                                                                                                                                                                                                                                                                                                                                                                                                                                                                                                                                                                                                                                                                                                                                                                                                                                                                                                                                                                                                                                                                                                                                                                                                                                                                                                                                                                                                                                                                                                                                                                                                                                                                                                                                                                                                                                                                                                                                                                                                                                                                      |
| Other types of telehealth                   | G0459, 98966, 98967, 98968, 98969, 99444, 0448T, 994X0, G0320, G0321, G0322                                                                                                                                                                                                                                                                                                                                                                                                                                                                                                                                                                                                                                                                                                                                                                                                                                                                                                                                                                                                                                                                                                                                                                                                                                                                                                                                                                                                                                                                                                                                                                                                                                                                                                                                                                                                                                                                                                                                                                                                       |

**eTable 2.** Detail on Low-Value Care Measures

| Measure                                                                                      | Codes for Detection and Exclusion <sup>a</sup>                                                                                                                                                                                                                                                                                                                                                                                                                                                                                                                                                                                                                                                                                                                                             | Eligible Population <sup>b</sup>  |
|----------------------------------------------------------------------------------------------|--------------------------------------------------------------------------------------------------------------------------------------------------------------------------------------------------------------------------------------------------------------------------------------------------------------------------------------------------------------------------------------------------------------------------------------------------------------------------------------------------------------------------------------------------------------------------------------------------------------------------------------------------------------------------------------------------------------------------------------------------------------------------------------------|-----------------------------------|
| <b>Office-based</b>                                                                          |                                                                                                                                                                                                                                                                                                                                                                                                                                                                                                                                                                                                                                                                                                                                                                                            |                                   |
| Cervical cancer screening for women over age 65                                              | <u>Detection:</u> CPT: G0101 G0123 G0124 G0141 G0143 G0144 G0145 G0147 G0148 P3000 P3001 Q0091 (cervical screening)<br><u>Exclusion:</u> ICD-10: Z8540 Z8541 Z8544 (history of cervical cancer)                                                                                                                                                                                                                                                                                                                                                                                                                                                                                                                                                                                            | Women over 65                     |
| <b>Mixed-modality</b>                                                                        |                                                                                                                                                                                                                                                                                                                                                                                                                                                                                                                                                                                                                                                                                                                                                                                            |                                   |
| Colorectal cancer screening for patients over age 85                                         | <u>Detection:</u> CPT: 45330-45350 45378-45392 G0104-G0106 G0120-G0122 G0328 82270 45398 (sigmoidoscopy, colonoscopy, barium enema or blood occult test for colon cancer screening) Z1211 (colon screening)                                                                                                                                                                                                                                                                                                                                                                                                                                                                                                                                                                                | Patients over 85                  |
| <b>Lab-based</b>                                                                             |                                                                                                                                                                                                                                                                                                                                                                                                                                                                                                                                                                                                                                                                                                                                                                                            |                                   |
| Prostate-specific antigen (PSA) testing for men over age 75                                  | <u>Detection:</u> CPT/HCPCS: G0103 (PSA screening)                                                                                                                                                                                                                                                                                                                                                                                                                                                                                                                                                                                                                                                                                                                                         | Men Over 75                       |
| Total or free T3 level testing for patients with hypothyroidism                              | <u>Detection:</u> CPT: 84480 84481 (total or free T3). CCW: Hypothyroidism first indication date                                                                                                                                                                                                                                                                                                                                                                                                                                                                                                                                                                                                                                                                                           | Patients with hypothyroidism      |
| 1,25-dihydroxyvitamin D testing in the absence of hypercalcemia or decreased kidney function | <u>Detection:</u> CPT:82652 (1,25-dihydroxyvitamin D3)<br><u>Exclusion:</u> CCW: Chronic kidney disease first indication date<br>ICD-10: E83.52 (Hypercalcemia) N25.81 (Secondary hyperparathyroidism of renal origin), D86 A15 A17 A18 A19 C44 C50 C64 C65 C67 C56 C81-C96 D45 (sarcoidosis, TB, select neoplasms, polycythemia)<br>ICD-9: 27542 (hypercalcemia) 58881 (secondary hyperparathyroidism of renal origin) 135x 01x 173x 174x 175x 1890 1891 188x 1830 200x-208x (sarcoidosis, TB, select neoplasms)                                                                                                                                                                                                                                                                          | All patients                      |
| <b>Imaging-based</b>                                                                         |                                                                                                                                                                                                                                                                                                                                                                                                                                                                                                                                                                                                                                                                                                                                                                                            |                                   |
| CT of the sinuses for uncomplicated acute rhinosinusitis                                     | <u>Detection:</u> CPT: 70486-70488 (CT of maxillofacial area) ICD-10: J01 J32 (sinusitis)<br><u>Exclusion:</u> E84 (cystic fibrosis) B20 B9735 D80-D84 D89 (immune disorders) J33 (nasal polyp) H00xx H01xx H05xx (eyelid/orbit inflammation) S0xxx S1xxx (head or face trauma)                                                                                                                                                                                                                                                                                                                                                                                                                                                                                                            | Patients with sinusitis diagnosis |
| Head imaging for uncomplicated headache                                                      | <u>Detection:</u> CPT: 70450 70460 70470 70551-70553 (CT or MRI of head or brain) ICD-10: R51 G43 G44 (headache/migraine)<br><u>Exclusion:</u> ICD-10: G443 G4453 (post-traumatic or thunderclap headache) G434 (hemiplegic migraine) G46 (vascular syndromes of brain in cerebrovascular diseases) M315 M316 (giant cell arteritis) G40 R56 (epilepsy or convulsions) I6xxx G45 G46 (cerebrovascular diseases) S0xxx S1xxx (head or face trauma) R20 R25-R27 R290xx R291xx R292xx R29701-R2970 R2971- R2974 R2981 R2990 R40 R41 R43 R47 R930 (altered mental status, nervous and musculoskeletal system symptoms, including gait abnormality, meningismus, disturbed skin sensation, speech deficits) Z8673 (personal history of stroke/TIA) Z85 (personal history of malignant neoplasm) | Patients with headache diagnosis  |
| Back imaging for patients with nonspecific low back pain                                     | <u>Detection:</u> CPT: 72010 72020 72052 72100 72110 72114 72120 72200 72202 72220 72131-72133 72141 72142 72146-72149 72156 72157 72158 (radiologic, CT, and MRI imaging of spine) ICD-10: M4720 M4726-M4728 M47816-M47819 M47896-M47899 M479 M4806-M4808 M5116 M5117 M5126 M5127 M5136 M5137 M5186 M5186 M5187 M519 M532C6 M532X7 M532X8 M533 M5386-M5388 M5416- M5418 M5430-M5432 M5440-M5442 M545 M5489 M549 M9903 M9904 M9923 M9933 M9943 M9953 M9963 M973 M9983 M9984 S335 S336 S338 S339 S39002 S39012 S39092 S3982 S3992 (back pain, various causes)                                                                                                                                                                                                                               | Patients with back pain           |

|  |                                                                                                                                                                                                                                                                                                                                                                                                                                                                                                                                                                                                                                                                                                                                                                                                 |  |
|--|-------------------------------------------------------------------------------------------------------------------------------------------------------------------------------------------------------------------------------------------------------------------------------------------------------------------------------------------------------------------------------------------------------------------------------------------------------------------------------------------------------------------------------------------------------------------------------------------------------------------------------------------------------------------------------------------------------------------------------------------------------------------------------------------------|--|
|  | <p><u>Exclusion:</u> ICD-10: Cxxxx D0 D37-D44 D46-D49 Z85 (neoplasms)<br/> S0xxx S10xx-S12xx S130x-S132x S140x S1411-S1415 S21xx S22xx<br/> S230x-S232x S240x S241x S26xx-S28xx S310x S32xx S330x-S334x<br/> S340x S3411-S3413 S36xx-S38xx S42xx S430x-S433x S490x<br/> S491x S52xx S530x-S533x S57xx S58xx S590x-S592x S62xx<br/> S630x-S634x S72xx S730x S77xx S78xx S790x S791x S82xx S830x<br/> S831x S87xx S88xx S890x-S893x S92xx S9030x S931x S97xx<br/> S98xx S990x-S992x T79xx (trauma) A15 A17-A19 (tuberculosis) F11<br/> F13-F15 (drug abuse) M462-M465 (osteomyelitis) G061 G834<br/> (neurologic impairment) I33 I38 I39 (endocarditis) A40 A41<br/> (septicemia) R50 R6883 R630 R634 R636 R538 R61 D649 (fever,<br/> weight loss, malaise, night sweats, anemia unspecified)</p> |  |
|--|-------------------------------------------------------------------------------------------------------------------------------------------------------------------------------------------------------------------------------------------------------------------------------------------------------------------------------------------------------------------------------------------------------------------------------------------------------------------------------------------------------------------------------------------------------------------------------------------------------------------------------------------------------------------------------------------------------------------------------------------------------------------------------------------------|--|

<sup>a</sup>Defined according to taxonomy from Schwartz et al 2014.<sup>2</sup>

<sup>b</sup>Defined according to taxonomy from Schwartz et al 2019.<sup>3</sup>

**eFigure.** Parallel Trends Assessment for Low-Value Care Services During Preintervention Period

A. Cervical cancer screening for women over age 65

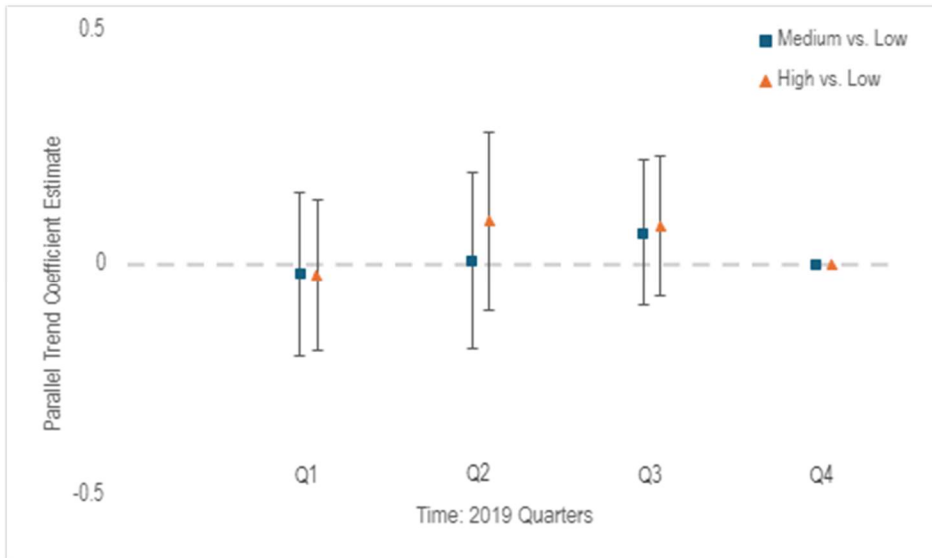

B. Colorectal cancer screening for adults over age 85

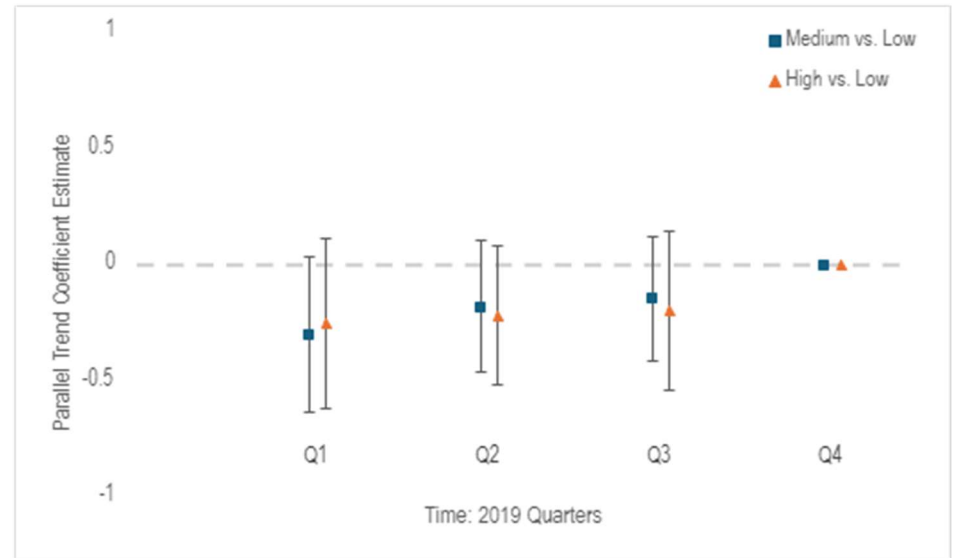

C. Prostate-specific antigen testing for men over age 75

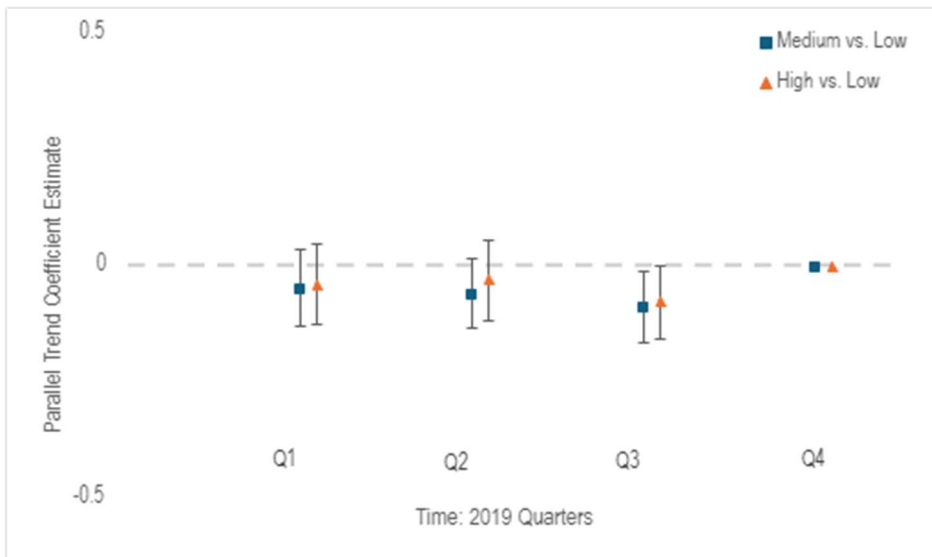

B. Total or free T3 level testing for patients with hypothyroidism

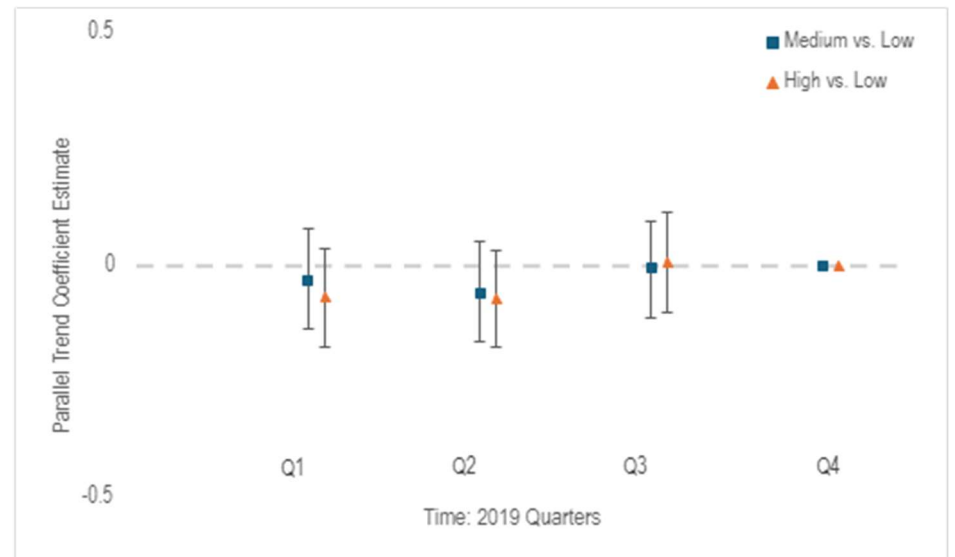

C. 1,25-dihydroxyvitamin D testing in absence of hypercalcemia or decreased kidney function

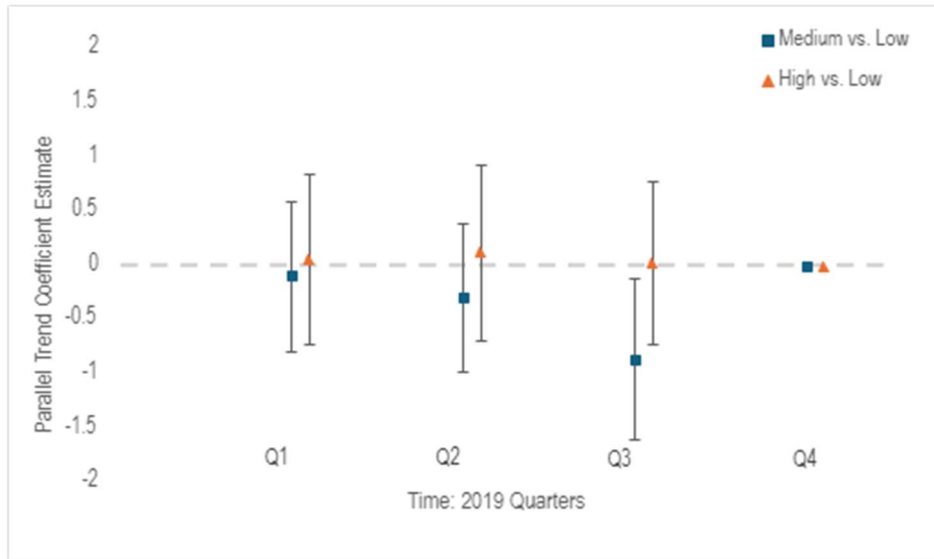

D. Computed tomography of sinuses for uncomplicated acute rhinosinusitis

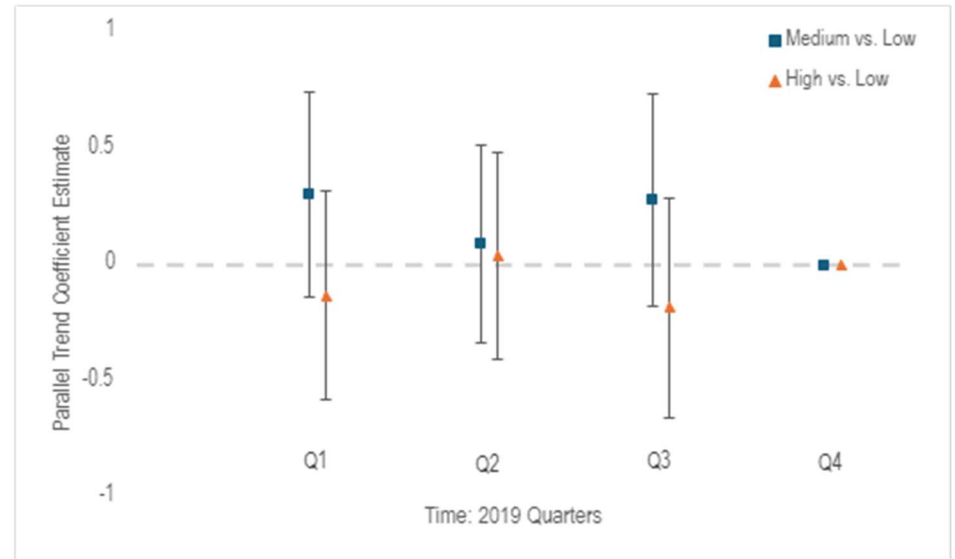

E. Head imaging for uncomplicated headache

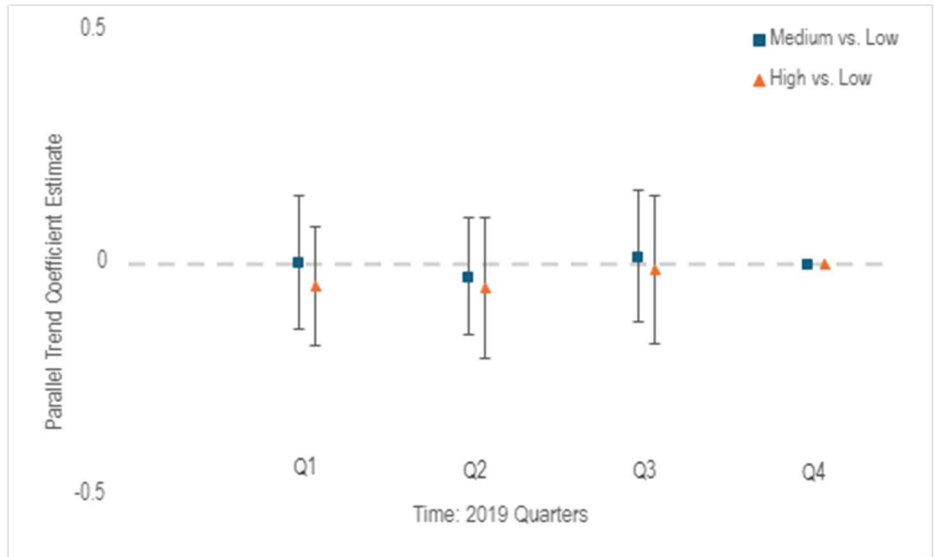

F. Back imaging for patients with non-specific low back pain

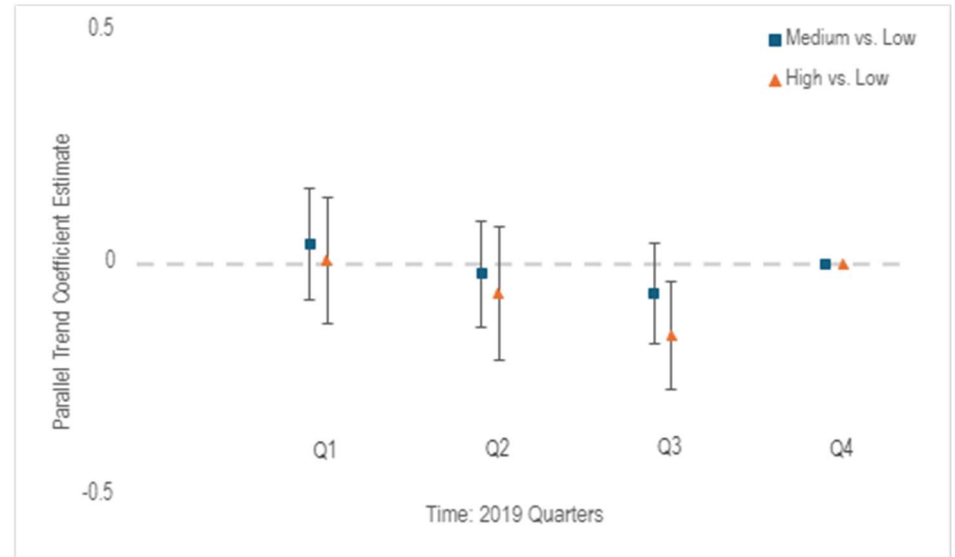

Note: Adjusted rates of low-value services were calculated in each quarter of 2019 to test the parallel trends assumption in the “pre-intervention” period. Adjusted rates of low-value services were calculated for high- and medium-telehealth use practices and compared to low-telehealth use practices. The y-axis represents the difference between rates of low-value services between high- and medium-telehealth use practices and those of low-telehealth use practices. The last quarter of 2019 was used as the reference period in these comparisons

**eTable 3.** Multivariable Regression Results of Association Between Telehealth Use Tertile and Office-Based and Mixed-Modality Low-Value Services

| Variable                                  | Office-based <sup>a</sup>      |         | Mixed-modality <sup>b</sup>    |         |
|-------------------------------------------|--------------------------------|---------|--------------------------------|---------|
|                                           | Estimated Coefficient (95% CI) | p value | Estimated Coefficient (95% CI) | p value |
| TH tertile # period <sup>c</sup>          |                                |         |                                |         |
| Medium - post                             | -0.26 (-0.46, -0.07)           | 0.009   | -0.08 (-0.32, 0.16)            | 0.511   |
| High - post                               | -0.27 (-0.53, -0.01)           | 0.042   | 0.24 (-0.01, 0.49)             | 0.061   |
| TH tertile                                |                                |         |                                |         |
| Medium                                    | -0.02 (-0.17, 0.14)            | 0.842   | 0.14 (-0.15, 0.43)             | 0.360   |
| High                                      | 0.09 (-0.09, 0.26)             | 0.353   | 0.09 (-0.22, 0.39)             | 0.583   |
| In-person tertile                         |                                |         |                                |         |
| Medium                                    | 0.10 (-0.05, 0.26)             | 0.176   | 0.24 (-0.02, 0.49)             | 0.065   |
| High                                      | 0.31 (0.12, 0.49)              | 0.001   | 0.53 (0.19, 0.86)              | 0.002   |
| Period (ref = 2019)                       |                                |         |                                |         |
| Post (2022)                               | -0.25 (-0.38, -0.13)           | <0.001  | -0.43 (-0.62, -0.25)           | <0.001  |
| Female Sex                                | 0.39 (-0.57, 1.35)             | 0.426   | 0.59 (-0.38, 1.56)             | 0.237   |
| Age (ref = ≥85)                           |                                |         |                                |         |
| 65 – 74                                   | 2.17 (1.29, 3.06)              | <0.001  | -2.58 (-3.58, -1.59)           | <0.001  |
| 75 – 84                                   | 2.52 (1.21, 3.83)              | <0.001  | -0.17 (-1.76, 1.43)            | 0.839   |
| Race/ethnicity (ref = other)              |                                |         |                                |         |
| White                                     | -0.74 (-1.79, 0.31)            | 0.166   | -1.04 (-2.56, 0.49)            | 0.183   |
| Black                                     | -1.01 (-2.09, 0.07)            | 0.067   | -0.43 (-1.98, 1.12)            | 0.585   |
| Hispanic                                  | -8.77 (-12.93, -4.60)          | <0.001  | -2.26 (-8.89, 4.38)            | 0.505   |
| Asian                                     | -0.03 (-2.00, 1.93)            | 0.973   | -4.33 (-8.90, 0.23)            | 0.063   |
| Share of rural beneficiaries <sup>d</sup> | -0.11 (-0.29, 0.08)            | 0.255   | 0.23 (-0.15, 0.62)             | 0.231   |
| Share of Medicaid-eligible beneficiaries  | -0.91 (-1.48, -0.35)           | 0.001   | -0.89 (-1.77, -0.02)           | 0.045   |
| HCC RAF Score                             | -0.48 (-0.90, -0.06)           | 0.026   | 0.44 (-0.32, 1.20)             | 0.256   |
| HCC RAF Score squared                     | 0.05 (-0.03, 0.14)             | 0.214   | -0.05 (-0.20, 0.09)            | 0.451   |

Abbreviations: TH, telehealth; HCC, Hierarchical Condition Categories; RAF, Risk Adjustment Factor

<sup>a</sup>Cervical cancer screening for women over age 65

<sup>b</sup>Colorectal cancer screening for patients over age 85

<sup>c</sup>Interaction between telehealth tertile (low, medium, high) and the time period (pre vs post)

<sup>d</sup>Rurality was defined at the beneficiary zip code level based on the Department of Agriculture's rural-urban commuting area codes<sup>4</sup>

**eTable 4.** Multivariable Regression Results of Association Between Telehealth Use Tertile and Laboratory-Based Low-Value Services

| Variable                                  | PSA testing for men >75 y     |         | Total or free T3 level testing for patients with hypothyroidism |         | Vitamin D testing in the absence of kidney disease or hypercalcemia |         |
|-------------------------------------------|-------------------------------|---------|-----------------------------------------------------------------|---------|---------------------------------------------------------------------|---------|
|                                           | Coefficient Estimate (95% CI) | p value | Coefficient Estimate (95% CI)                                   | p value | Coefficient Estimate (95% CI)                                       | p value |
| TH tertile # period <sup>a</sup>          |                               |         |                                                                 |         |                                                                     |         |
| Medium - post                             | -0.03 (-0.11, 0.04)           | 0.379   | -0.26 (-0.40, -0.11)                                            | <0.001  | -0.07 (-0.71, 0.57)                                                 | 0.821   |
| High - post                               | 0.02 (-0.06, 0.09)            | 0.657   | -0.17 (-0.30, -0.04)                                            | 0.013   | -0.28 (-1.03, 0.48)                                                 | 0.477   |
| TH tertile                                |                               |         |                                                                 |         |                                                                     |         |
| Medium                                    | 0.00 (-0.08, 0.09)            | 0.970   | -0.19 (-0.39, 0.02)                                             | 0.077   | 0.37 (-0.01, 0.75)                                                  | 0.056   |
| High                                      | 0.04 (-0.10, 0.18)            | 0.615   | -0.05 (-0.22, 0.13)                                             | 0.590   | 0.32 (-0.06, 0.71)                                                  | 0.102   |
| In-person tertile                         |                               |         |                                                                 |         |                                                                     |         |
| Medium                                    | 0.31 (0.21, 0.42)             | <0.001  | -0.02 (-0.19, 0.15)                                             | 0.822   | 0.44 (0.04, 0.83)                                                   | 0.032   |
| High                                      | 0.54 (0.37, 0.70)             | <0.001  | 0.32 (0.11, 0.53)                                               | 0.003   | 0.87 (0.36, 1.38)                                                   | 0.001   |
| Period (ref = 2019)                       |                               |         |                                                                 |         |                                                                     |         |
| Post (2022)                               | 0.04 (-0.02, 0.10)            | 0.224   | 0.25 (0.14, 0.35)                                               | <0.001  | -1.02 (-1.50, -0.55)                                                | <0.001  |
| Female Sex                                | -0.26 (-0.71, 0.19)           | 0.252   | -0.01 (-0.87, 0.85)                                             | 0.979   | 1.02 (-0.86, 2.91)                                                  | 0.286   |
| Age (ref = ≥85)                           |                               |         |                                                                 |         |                                                                     |         |
| 65 – 74                                   | 0.85 (0.34, 1.37)             | 0.001   | 1.69 (0.80, 2.58)                                               | <0.001  | -1.05 (-3.40, 1.31)                                                 | 0.382   |
| 75 – 84                                   | 2.91 (2.23, 3.59)             | <0.001  | 1.57 (0.17, 2.98)                                               | 0.029   | 0.55 (-3.83, 4.92)                                                  | 0.806   |
| Race/ethnicity (ref = other)              |                               |         |                                                                 |         |                                                                     |         |
| White                                     | -1.08 (-1.79, -0.36)          | 0.003   | -1.26 (-2.33, -0.18)                                            | 0.022   | -3.02 (-5.26, -0.78)                                                | 0.008   |
| Black                                     | -0.80 (-1.49, -0.11)          | 0.023   | -0.78 (-1.80, 0.24)                                             | 0.134   | -1.58 (-3.94, 0.78)                                                 | 0.188   |
| Hispanic                                  | -4.50 (-6.69, -2.31)          | <0.001  | -4.53 (-8.79, -0.27)                                            | 0.037   | -2.53 (-8.64, 3.58)                                                 | 0.417   |
| Asian                                     | -1.42 (-3.18, 0.33)           | 0.112   | -2.91 (-5.73, -0.08)                                            | 0.043   | -3.79 (-11.24, 3.66)                                                | 0.319   |
| Share of rural beneficiaries <sup>b</sup> | -0.20 (-0.32, -0.08)          | 0.001   | -0.59 (-0.82, -0.35)                                            | <0.001  | 0.57 (-0.06, 1.20)                                                  | 0.076   |
| Share of Medicaid-eligible beneficiaries  | 0.03 (-0.29, 0.36)            | 0.841   | 0.34 (-0.11, 0.80)                                              | 0.133   | 0.39 (-0.79, 1.58)                                                  | 0.517   |
| HCC RAF Score                             | 0.34 (0.07, 0.61)             | 0.012   | 0.31 (-0.23, 0.84)                                              | 0.261   | 0.24 (-0.89, 1.37)                                                  | 0.675   |
| HCC RAF Score Squared                     | -0.12 (-0.18, -0.07)          | <0.001  | -0.05 (-0.14, 0.04)                                             | 0.278   | -0.03 (-0.22, 0.16)                                                 | 0.764   |

Abbreviations: PSA, prostate-specific antigen; TH, telehealth; HCC, Hierarchical Condition Categories; RAF, Risk Adjustment Factor

<sup>a</sup>Interaction between telehealth tertile (low, medium, high) and the time period (pre vs post)

<sup>b</sup>Rurality was defined at the beneficiary zip code level based on the Department of Agriculture's rural-urban commuting area codes<sup>4</sup>



**eTable 5.** Multivariable Regression Results of Association Between Telehealth Use Tertile and Imaging-Based Low-Value Services

| Variable                                  | CT of sinuses for uncomplicated acute rhinosinusitis |         | Head imaging for uncomplicated headache |         | Back imaging for non-specific low back pain |         |
|-------------------------------------------|------------------------------------------------------|---------|-----------------------------------------|---------|---------------------------------------------|---------|
|                                           | Coefficient Estimate (95% CI)                        | p value | Coefficient Estimate (95% CI)           | p value | Coefficient Estimate (95% CI)               | p value |
| TH tertile # period <sup>a</sup>          |                                                      |         |                                         |         |                                             |         |
| Medium - post                             | 0.19 (-0.06, 0.44)                                   | 0.142   | -0.04 (-0.12, 0.05)                     | 0.379   | -0.01 (-0.07, 0.05)                         | 0.754   |
| High - post                               | 0.05 (-0.21, 0.32)                                   | 0.682   | -0.09 (-0.18, 0.01)                     | 0.072   | -0.04 (-0.10, 0.02)                         | 0.214   |
| TH tertile                                |                                                      |         |                                         |         |                                             |         |
| Medium                                    | -0.20 (-0.40, -0.01)                                 | 0.039   | 0.02 (-0.04, 0.08)                      | 0.562   | 0.01 (-0.06, 0.09)                          | 0.691   |
| High                                      | -0.03 (-0.22, 0.17)                                  | 0.799   | -0.01 (-0.09, 0.07)                     | 0.808   | -0.03 (-0.10, 0.04)                         | 0.402   |
| In-person tertile                         |                                                      |         |                                         |         |                                             |         |
| Medium                                    | -0.20 (-0.40, 0.00)                                  | 0.052   | 0.03 (-0.04, 0.09)                      | 0.411   | -0.03 (-0.10, 0.05)                         | 0.444   |
| High                                      | -0.11 (-0.33, 0.11)                                  | 0.312   | 0.06 (0.00, 0.12)                       | 0.063   | -0.03 (-0.11, 0.06)                         | 0.526   |
| Period (ref = 2019)                       |                                                      |         |                                         |         |                                             |         |
| Post (2022)                               | 0.24 (0.06, 0.43)                                    | 0.011   | -0.03 (-0.09, 0.03)                     | 0.289   | 0.02 (-0.03, 0.06)                          | 0.519   |
| Female Sex                                | -0.61 (-1.46, 0.23)                                  | 0.156   | 0.15 (-0.11, 0.40)                      | 0.263   | 0.27 (0.05, 0.49)                           | 0.015   |
| Age (ref = ≥85)                           |                                                      |         |                                         |         |                                             |         |
| 65 – 74                                   | -0.53 (-1.63, 0.57)                                  | 0.347   | -0.33 (-0.65, -0.01)                    | 0.046   | -0.11 (-0.38, 0.15)                         | 0.399   |
| 75 – 84                                   | -0.51 (-2.40, 1.37)                                  | 0.592   | -0.04 (-0.58, 0.49)                     | 0.872   | 0.25 (-0.17, 0.66)                          | 0.241   |
| Race/ethnicity (ref = other)              |                                                      |         |                                         |         |                                             |         |
| White                                     | -1.11 (-2.41, 0.19)                                  | 0.093   | -0.03 (-0.51, 0.44)                     | 0.891   | -0.14 (-0.64, 0.36)                         | 0.581   |
| Black                                     | -0.54 (-1.82, 0.75)                                  | 0.412   | 0.41 (-0.05, 0.87)                      | 0.084   | -0.41 (-0.93, 0.10)                         | 0.113   |
| Hispanic                                  | 1.26 (-1.22, 3.73)                                   | 0.320   | -0.53 (-1.77, 0.71)                     | 0.401   | 0.52 (-0.53, 1.58)                          | 0.333   |
| Asian                                     | -2.29 (-4.85, 0.28)                                  | 0.081   | 0.27 (-0.62, 1.16)                      | 0.557   | -0.07 (-1.11, 0.97)                         | 0.895   |
| Share of rural beneficiaries <sup>b</sup> | -0.41 (-0.67, -0.14)                                 | 0.003   | 0.02 (-0.06, 0.10)                      | 0.646   | -0.15 (-0.21, -0.08)                        | <0.001  |
| Share of Medicaid-eligible beneficiaries  | -0.77 (-1.46, -0.09)                                 | 0.027   | -0.29 (-0.47, -0.10)                    | 0.002   | -0.60 (-0.81, -0.39)                        | <0.001  |
| HCC RAF Score                             | -0.04 (-0.73, 0.66)                                  | 0.916   | 0.48 (0.32, 0.64)                       | <0.001  | -0.08 (-0.22, 0.07)                         | 0.289   |
| HCC RAF Score Squared                     | -0.02 (-0.14, 0.10)                                  | 0.754   | -0.05 (-0.08, -0.02)                    | <0.001  | 0.04 (0.01, 0.06)                           | 0.004   |

Abbreviations: CT, computed tomography; TH, telehealth; HCC, Hierarchical Condition Categories; RAF, Risk Adjustment Factor

<sup>a</sup>Interaction between telehealth tertile (low, medium, high) and the time period (pre vs post)

<sup>b</sup>Rurality was defined at the beneficiary zip code level based on the Department of Agriculture's rural-urban commuting area codes<sup>4</sup>

## eReferences

1. Centers for Medicare & Medicaid Services. List of Telehealth Services. November 13, 2023. Accessed September 11, 2024. <https://www.cms.gov/medicare/coverage/telehealth/list-services>
2. Schwartz AL, Landon BE, Elshaug AG, Chernew ME, McWilliams JM. Measuring Low-Value Care in Medicare. *JAMA Internal Medicine*. 2014;174(7):1067-1076.
3. Schwartz AL, Jena AB, Zaslavsky AM, McWilliams JM. Analysis of Physician Variation in Provision of Low-Value Services. *JAMA Internal Medicine*. 2019;179(1):16-25.
4. Department of Agriculture, Economic Research Service. Rural-Urban Commuting Area Codes. Accessed May 10, 2024. <https://www.ers.usda.gov/data-products/rural-urban-commuting-area-codes>
