# Supplementary material for: Primary Care Practice Telehealth Use and Low-Value Care Services
Source: PubMed Central journal article supplement (PMC11544489; doi:10.1001/jamanetworkopen.2024.45436), 2024-11-07
Supplement: jamanetwopen-e2445436-s002.pdf [file jamanetwopen-e2445436-s002.pdf]

## Data Sharing Statement

Liu. Primary Care Practice Telehealth Use and Low-Value Care Services. *JAMA Netw Open*.  
Published November 07, 2024. doi:10.1001/jamanetworkopen.2024.45436

### Data

**Data available:** No

### Additional Information

**Explanation for why data not available:** Our data use agreement with Centers for Medicare & Medicaid Services does not allow us to share the data.
